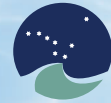

## Corrigendum

# Beyond consensus: perceptions of risk from petroleum developments in Lofoten, Vesterålen, and Senja, Norway

Maiken Bjørkan\* and Siri Veland

*Department of Environment, Nordland Research Institute, PO Box 1490, 8049 Bodø, Norway*

\*Corresponding author: tel: +47 09 30 88 577; e-mail: [maiken.bjorkan@nforsk.no](mailto:maiken.bjorkan@nforsk.no).

Bjørkan, M. and Veland, S. Beyond consensus: perceptions of risk from petroleum developments in Lofoten, Vesterålen, and Senja, Norway. – ICES Journal of Marine Science, 76: 1935.

Advance access publication 9 June 2019.

ICES Journal of Marine Science (2019), doi:10.1093/icesjms/fsz056.

There was a typo in the article title—‘consensus’ instead of ‘consensus’. This has now been corrected.

Additionally, in the original article, an erroneous publication had been included in the reference list. The following reference has been added:

Dale, B., Veland, S., and Merrild Hansen, A. (2018). “Petroleum as a Challenge to Arctic Societies. Findings from the ARCTICCHALLENGE project and suggestions for future research.” *The Extractive Industries and Society*. In press. Available online 23 October 2018 <https://doi.org/10.1016/j.exis.2018.10.002>

The following reference has been removed:

Dale B., Skorstad B., Bay-Larsen I. 2018. *The Will to Drill. Mining and Arctic Communities*. Springer, London.

Additionally, page 4 of the article originally contained in-text references to URLs that led to an error page. These have been converted to author-date format and placed in the reference list:

FishSafe. (2019). "Sikkerhetssoner på overflaten (Security zones on the surface)." *Fishing Safely in Changing European Waters 2016 – 2019*. Retrieved 16 April 2019, from <http://www.fishsafe.eu/no/sikkerhetssoner/sikkerhetssoner-paa-overflaten.aspx>.

Aadland, Camilla. "Skal Finne Ut Hvordan Seismikk Påvirker Torsken." *Fiskeribladet* 10 January 2018. Print.

Cumming, Wenche. "Oljeindustrien Forsøker Nedtone Olje Og Fisk-Konflikter." *Fiskeribladet* 31 March 2018. Print.

Jensen, Terje. "Oljeulykke Utenfor Lofoten Kan Redusere Antall Skrei Med 13 Prosent." *Fiskeribladet* 31 August 2017. Print.

Martinussen, Torhild Måkestad. "Hysebekymring På Reguleringsmøtet." *Fiskeribladet* 7 June 2018. Print.

Robertsen, Ørjan. "Kunnskap Og Symboler." *Fiskeribladet* 17 September 2017. Print.
